# Supplementary material
Source: PubMed Central journal article supplement (PMC4023735)
Supplement: AAC.01239-13_zac004142740so1.pdf [file AAC.01239-13_zac004142740so1.pdf]

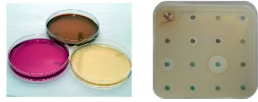

Carba NP test colonies

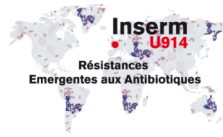

## Rapid detection of carbapenemase activity in *Enterobacteriaceae*

### The Carba NP (Nordmann-Poirel) test using bacterial colonies

*To be used with enterobacteriaceae showing any slight decreased susceptibility to any carbapenem (imipenem, meropenem, ertapenem)*

**"A similar protocol can be used for the detection of carbapenemase activity from *P.aeruginosa* colonies"**

#### Protocol

1. Add 100 µl of 20 mM Tris-HCl lysis buffer (B-PERII, Bacterial Protein Extraction Reagent, Thermo Scientific, Pierce) in each of two 1.5 ml eppendorf tubes
2. Resuspend a 1/4 to 1/3 calibrated oese (10 µl) of bacterial colonies in each of those 100 µl of 20 mM Tris-HCl lysis buffer. (bacterial colonies may be recovered directly from the antibiogram around disk of carbapenem performed according to the disk diffusion techniques).

NB : Carba NP test was validated with bacterial colonies grown on Mueller-Hinton agar plates (Becton Dickinson, Le Pont de Chaix, France), blood agar plates, trypticase soy agar plates, and most of selective media used for carbapenemase producers screening. Carba NP test **CANNOT** be performed with bacterial colonies grown on Drigalski or McConkey plates.

**Recommended medium : trypticase soy agar supplemented with ZnSO<sub>4</sub> at 70 µg/ml**

3. Check that bacterial colonies have been correctly resuspended. If necessary mix up and down with a pipette
4. Add (i) 100 µl of Solution A in the first eppendorf tube and (ii) 100 µl Solution A + imipenem 6 mg/ml in the second 1.5 ml eppendorf tube.
5. Incubate at 37°C for a maximum of 2 hours
6. Optical reading of the color of each tube

#### Interpretation :

|                        | No antibiotic | Imipenem      |
|------------------------|---------------|---------------|
| No carbapenemase       | Red           | Red           |
| Carbapenemase producer | Red           | Orange/Yellow |
| Not interpretable      | Yellow        | Yellow        |

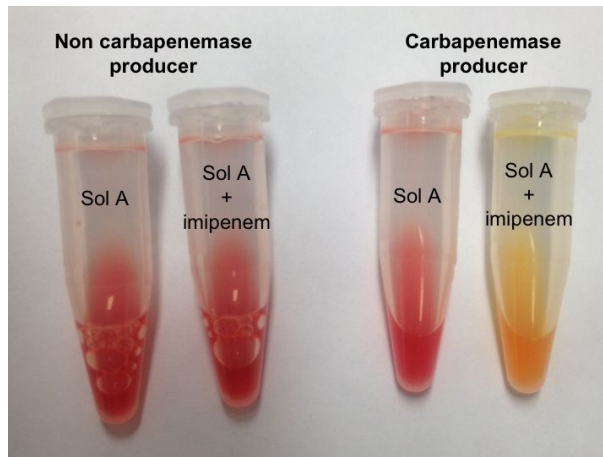

Usually, the time required for obtaining positive results is as follows :

- KPC producers : 2 to 30 min
- OXA-48 like producers : 20 min to 1h
- Metallo- $\beta$ -lactamases (NDM, VIM, IMP) : 15 min to 1h

### **Material**

- 1.5 ml Eppendorf tubes
- Imipenem sodium salt (Sigma-Aldrich) or Imipenem + cilastatin (drug used for patient treatment).
- B-PERII, Bacterial Protein Extraction Reagent (Thermo Scientific, Pierce), Cat : 78260.
- $ZnSO_4 \cdot 7H_2O$  (Sigma-Aldrich, Cat : 221376)
- Negative (wild-type *E. coli*) and positive (*K. pneumoniae* OXA-48 or *K. pneumoniae* KPC-2) controls.

### **Preparation and storage of Solution A**

1. Prepare a concentrated solution of red phenol 0.5% w/v
2. Mix 2 ml of the concentrated red phenol solution (strongly vortex before pipetting to resuspend the solution) in 16.6 ml of distilled water
3. Adjust the pH at 7.8 by adding drops of a NaOH solution (1 N)
4. Add 180  $\mu$ l of  $ZnSO_4$  (Sigma-Aldrich, Cat : 221376) 10 mM to obtain a final concentration of 0.1 mM

Solution A is stable at room temperature for 1 week and may be kept at  $-20^\circ\text{C}$  for several months.

**Solution A + imipenem (6 mg/ml) has to be prepared extemporaneously.**

**However, batches of imipenem powders can be weighted and prepared in advance and kept at  $4^\circ\text{C}$  for two weeks if solution A is not added.**

**• 600  $\mu$ l of solution A is needed for each test (solution A, solution A + imipenem, positive and negative controls).**
